# Supplementary material for: Development and Characterization of PEGylated Fatty Acid-Block-Poly(ε-caprolactone) Novel Block Copolymers and Their Self-Assembled Nanostructures for Ocular Delivery of Cyclosporine A
Source: MDPI journal article supplement (doi:10.3390/polym14091635), 2022-04-19
Supplement: s1 [file s1]

## Supplementary Materials:

### Development and Characterization of PEGylated Fatty Acid-*block*-Poly( $\epsilon$ -Caprolactone) Novel Block Copolymers and Their Self-Assembled Nanostructures for Ocular Delivery of Cyclosporine A

Ziyad Binkhathlan\*, Abdullah H. Alomrani, Olsi Hoxha, Raisuddin Ali, Mohd Abul Kalam, and  
Aws Alshamsan

## Supplementary Figures

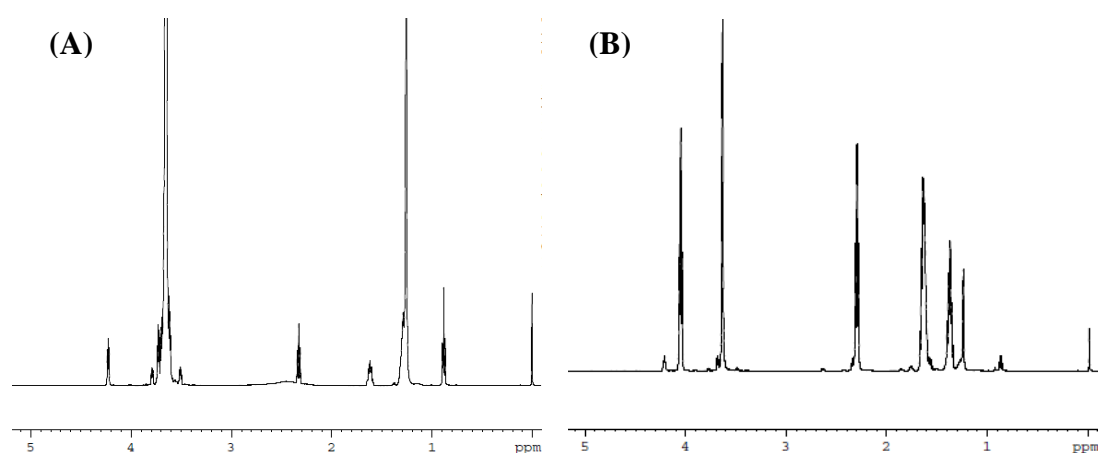

**Figure S1.** Representative  $^1\text{H}$  NMR spectra of Myrj S40 (A) and Myrj S40-*b*-PCL<sub>35</sub> (B).

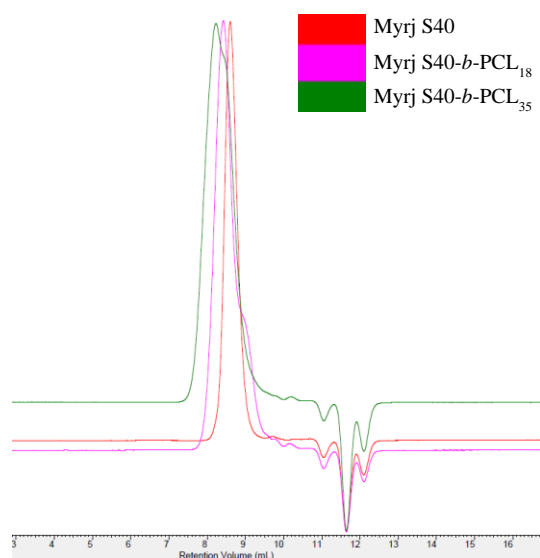

**Figure S2.** GPC chromatograms of unmodified Myrj S40 and the synthesized Myrj S40-*b*-PCL copolymers.

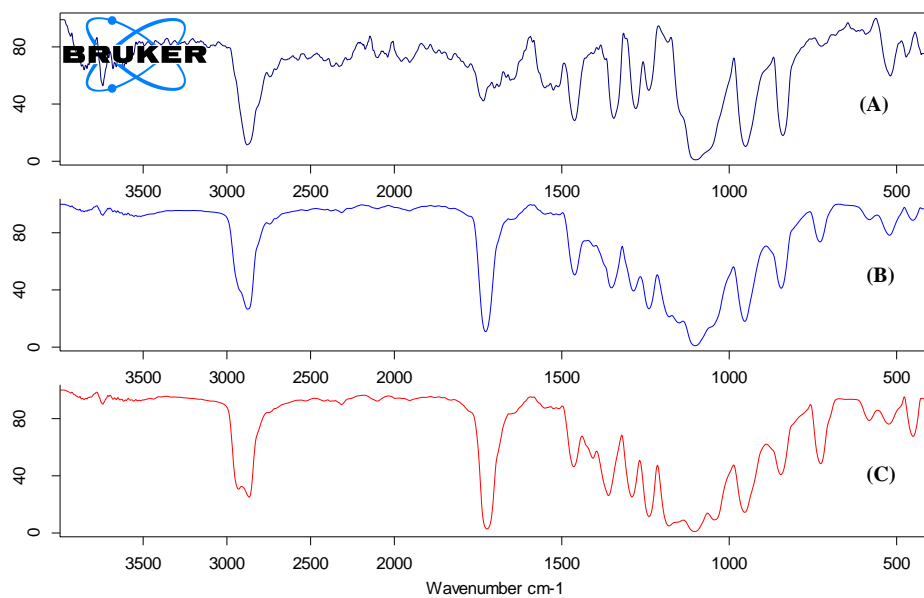

**Figure S3.** FTIR spectra of Myrj S40 (A), Myrj S40-*b*-PCL<sub>18</sub> (B), and Myrj S40-*b*-PCL<sub>35</sub> (C).

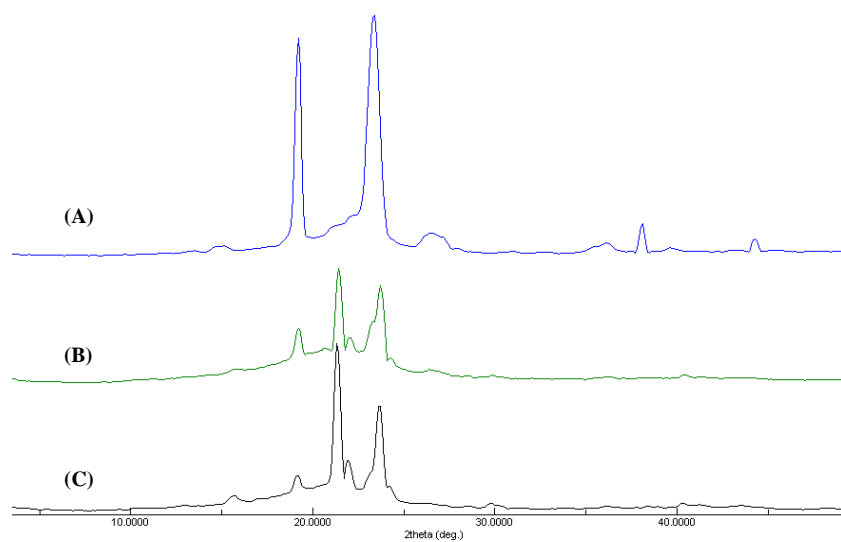

**Figure S4.** XRD diffractograms of Myrj S40 (A), Myrj S40-*b*-PCL<sub>18</sub> (B), and Myrj S40-*b*-PCL<sub>35</sub> (C).

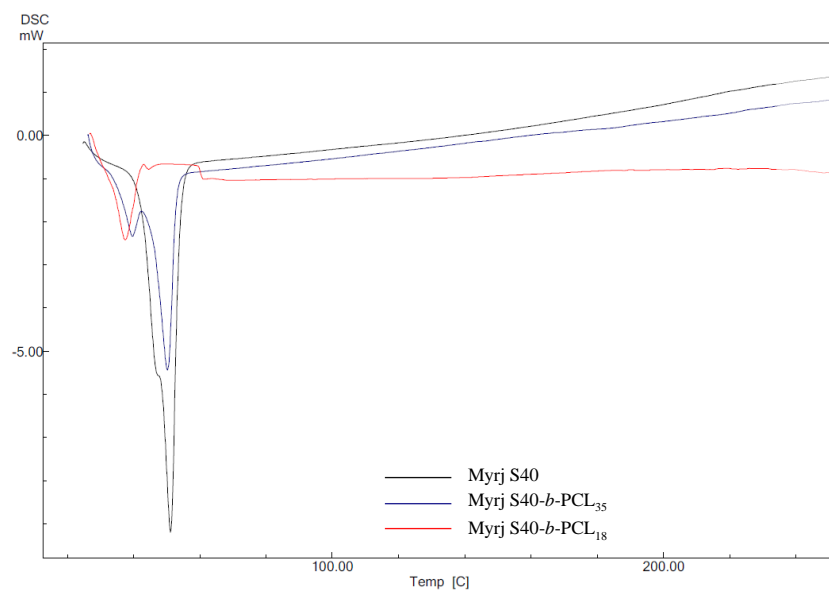

**Figure S5.** DSC thermograms of Myrj S40, Myrj S40-*b*-PCL<sub>18</sub>, and Myrj S40-*b*-PCL<sub>35</sub>.

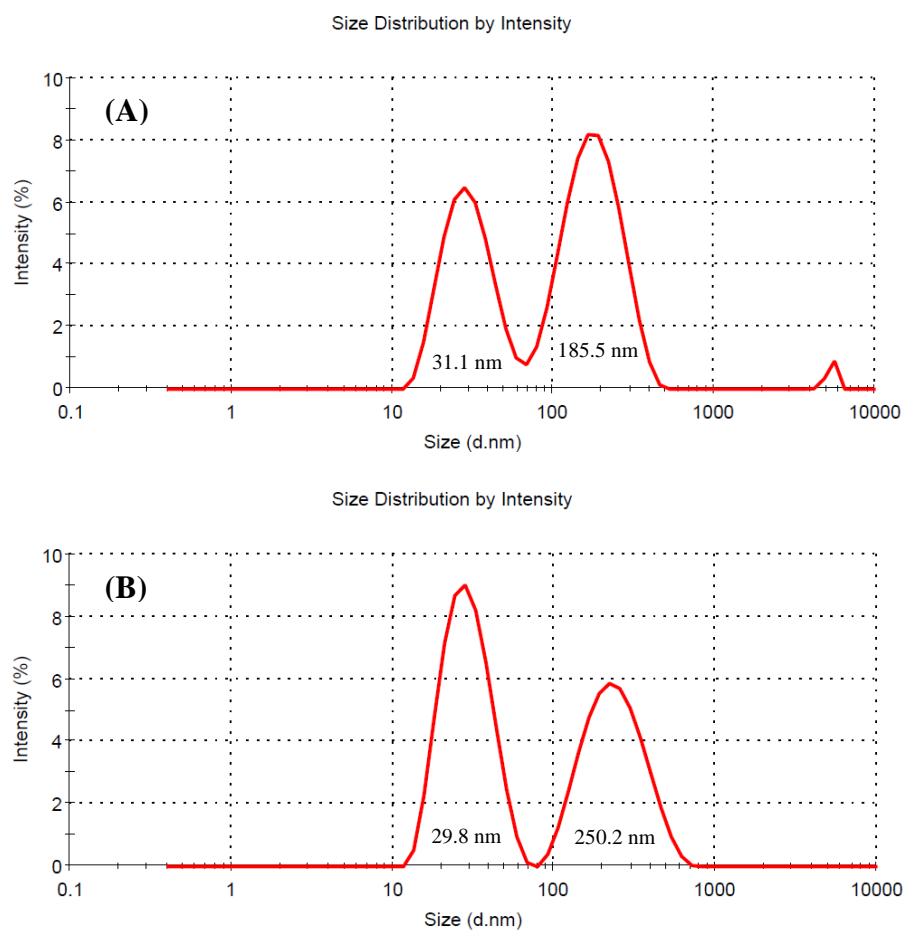

**Figure S6.** Representative size distribution profiles of (A) unloaded Myrj S100-*b*-PCL<sub>44</sub> micelles and (B) CyA-loaded Myrj S100-*b*-PCL<sub>44</sub> nanocarriers obtained by dynamic light scattering (Zetasizer Nano ZS, Malvern Instrument Ltd., UK) showing bimodal size population.

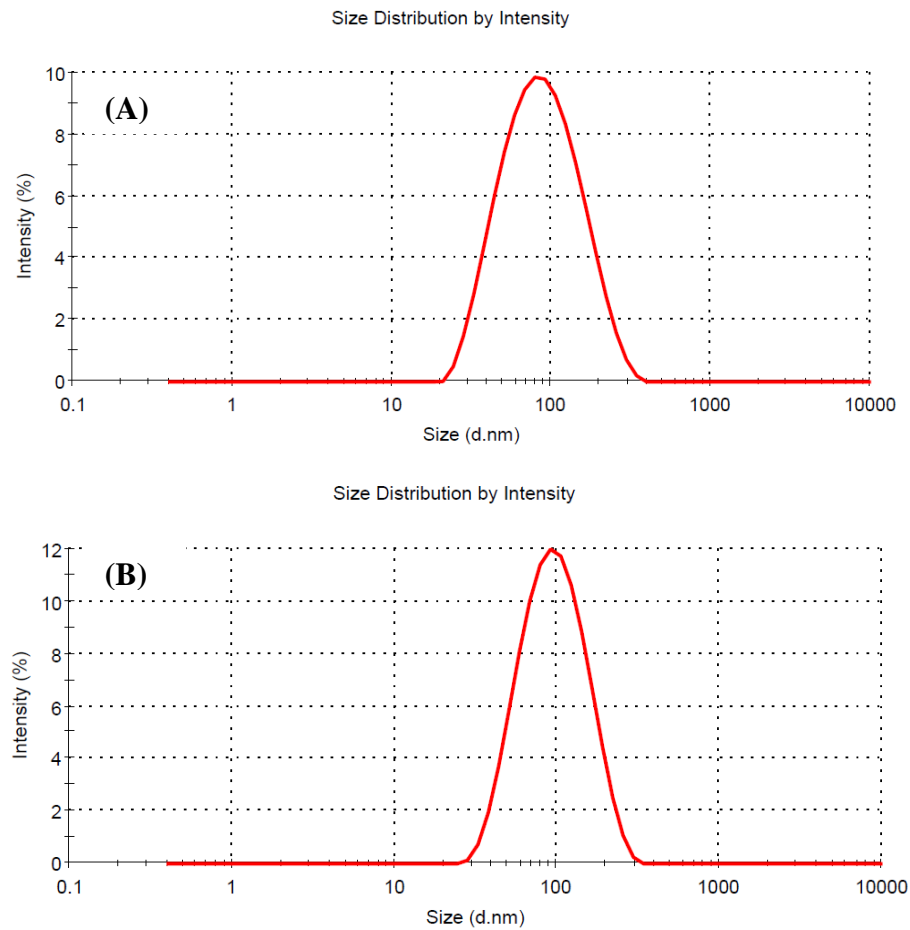

**Figure S7.** Representative size distribution profiles of (A) unloaded Myrj S100-*b*-PCL<sub>88</sub> micelles and (B) CyA-loaded Myrj S100-*b*-PCL<sub>88</sub> nanocarriers obtained by dynamic light scattering (Zetasizer Nano ZS, Malvern Instrument Ltd., UK) showing bimodal size population.

## Supplementary Tables

**Table S1. Grading system for ocular lesions in irritation tests**

| Cornea                                                                                                                                                                                  |                        |           |
|-----------------------------------------------------------------------------------------------------------------------------------------------------------------------------------------|------------------------|-----------|
| Lesion                                                                                                                                                                                  |                        | Score     |
| <b>I. Opacity-Degree of density (area which is most dense is taken for reading)</b>                                                                                                     |                        |           |
| No ulceration or opacity                                                                                                                                                                |                        | 0         |
| Scattered or diffuse area – details of iris clearly visible                                                                                                                             |                        | 1         |
| Easily discernible translucent areas, details of iris slightly obscured                                                                                                                 |                        | 2         |
| Opalescent areas, no details of iris visible, size of pupil barely discernible                                                                                                          |                        | 3         |
| Opaque, iris invisible                                                                                                                                                                  |                        | 4         |
| <b>II. Area of cornea involved</b>                                                                                                                                                      |                        |           |
| One quarter (or less) but not zero                                                                                                                                                      |                        | 1         |
| Greater than one quarter but less than one half                                                                                                                                         |                        | 2         |
| Greater than one half but less than three quarters                                                                                                                                      |                        | 3         |
| Greater than three quarters up to whole area                                                                                                                                            |                        | 4         |
| <b>Score equals (I x II x 5):</b>                                                                                                                                                       | <b>Total maximum =</b> | <b>80</b> |
| Iris                                                                                                                                                                                    |                        |           |
| Lesion                                                                                                                                                                                  |                        | Score     |
| <b>I. Values</b>                                                                                                                                                                        |                        |           |
| Normal                                                                                                                                                                                  |                        | 0         |
| Folds above normal, congestion, swelling, circumcorneal injection (any one or all of these or combination of any thereof), iris still reacting to light (sluggish reaction is positive) |                        | 1         |
| No reaction to light, hemorrhage; gross destruction (anyone/ all of these)                                                                                                              |                        | 2         |
| <b>Score equals (I x 5):</b>                                                                                                                                                            | <b>Total maximum =</b> | <b>10</b> |
| Conjunctiva                                                                                                                                                                             |                        |           |
| Lesion                                                                                                                                                                                  |                        | Score     |
| <b>I. Redness (refers to palpebral conjunctiva only)</b>                                                                                                                                |                        |           |
| Vessels normal                                                                                                                                                                          |                        | 0         |
| Vessels definitely injected above normal                                                                                                                                                |                        | 1         |
| More diffuse, deeper crimson red, individual vessels not easily discernible                                                                                                             |                        | 2         |
| Diffuse beefy red                                                                                                                                                                       |                        | 3         |
| <b>II. Chemosis</b>                                                                                                                                                                     |                        |           |
| No swelling                                                                                                                                                                             |                        | 0         |
| Any swelling above normal (includes nictitating membrane)                                                                                                                               |                        | 1         |
| Obvious swelling with partial eversion of the lids                                                                                                                                      |                        | 2         |
| Swelling with lids about half closed                                                                                                                                                    |                        | 3         |
| Swelling with lids about half closed to completely closed                                                                                                                               |                        | 4         |
| <b>III. Discharge</b>                                                                                                                                                                   |                        |           |
| No discharge                                                                                                                                                                            |                        | 0         |
| Any amount different from normal (does not include small amount observed in inner canthus of normal animals)                                                                            |                        | 1         |
| Discharge with moistening of the lids and hairs just adjacent to the lids                                                                                                               |                        | 2         |
| Discharge with moistening of the lids and considerable area around the eye                                                                                                              |                        | 3         |
| <b>Score equals (I + II + III) x 2:</b>                                                                                                                                                 | <b>Total maximum =</b> | <b>20</b> |

**Table S2.** Classification of eye irritation scoring system

| <b>MMTS*</b> | <b>Irritation classification</b> |
|--------------|----------------------------------|
| 0.0-0.5      | None                             |
| 0.6-2.5      | Practically none                 |
| 2.6-15.0     | Minimally                        |
| 15.1-25.0    | Mildly                           |
| 25.1-50.0    | Moderately                       |
| 50.1-80.0    | Severely                         |
| 80.1-100.0   | Extremely                        |
| 100.1-110.0  | Maximally                        |

\* MMTS: Maximum Mean Total Score
